# Supplementary material for: High-throughput mapping of single-neuron projection and molecular features by retrograde barcoded labeling
Source: eLife. 2024 Feb 23;13:e85419. doi: 10.7554/eLife.85419 (PMC10914349; doi:10.7554/eLife.85419)
Supplement: Figure 4—source data 2. — Files contain the raw quantitative data of immunostaining results. [file elife-85419-fig4-data2.xlsx]

## Sheet: Sheet1
Slice id	mouse id	syt6	syt6+gfp+	layer5GFP	layer5GFP+SYT6	layer6GFP	layer6GFP+SYT6
id-2	#3	272	173	261	11	153	134
id-3	#4	272	129	149	15	131	131
id-5	#3	312	119	212	7	200	200
id-6	#4	178	132	216	57	86	83
id-4	#2	226	78	102	38	238	188
