# Supplementary material for: High-throughput mapping of single-neuron projection and molecular features by retrograde barcoded labeling
Source: eLife. 2024 Feb 23;13:e85419. doi: 10.7554/eLife.85419 (PMC10914349; doi:10.7554/eLife.85419)
Supplement: Figure 5—source data 2. — Files contain the raw quantitative data of immunostaining results. [file elife-85419-fig5-data2.xlsx]

## Sheet: Sheet1
slice id	mouse id	Pou3f1+	egfp+tdt+Pou3f1+	egfp+tdt-Pou3f1+	egfp-tdt+Pou3f1+	egfp-tdt-Pou3f1+
5	#15	216	94	20	86	16
7	#17	198	106	16	74	2
9	#15	161	88	11	58	4
10	#16	156	113	20	13	10
11	#17	121	66	9	44	2
