# Supplementary figures and images for: High-throughput mapping of single-neuron projection and molecular features by retrograde barcoded labeling
Source: eLife journal article supplement (doi:10.7554/elife.85419), 2024-02-23

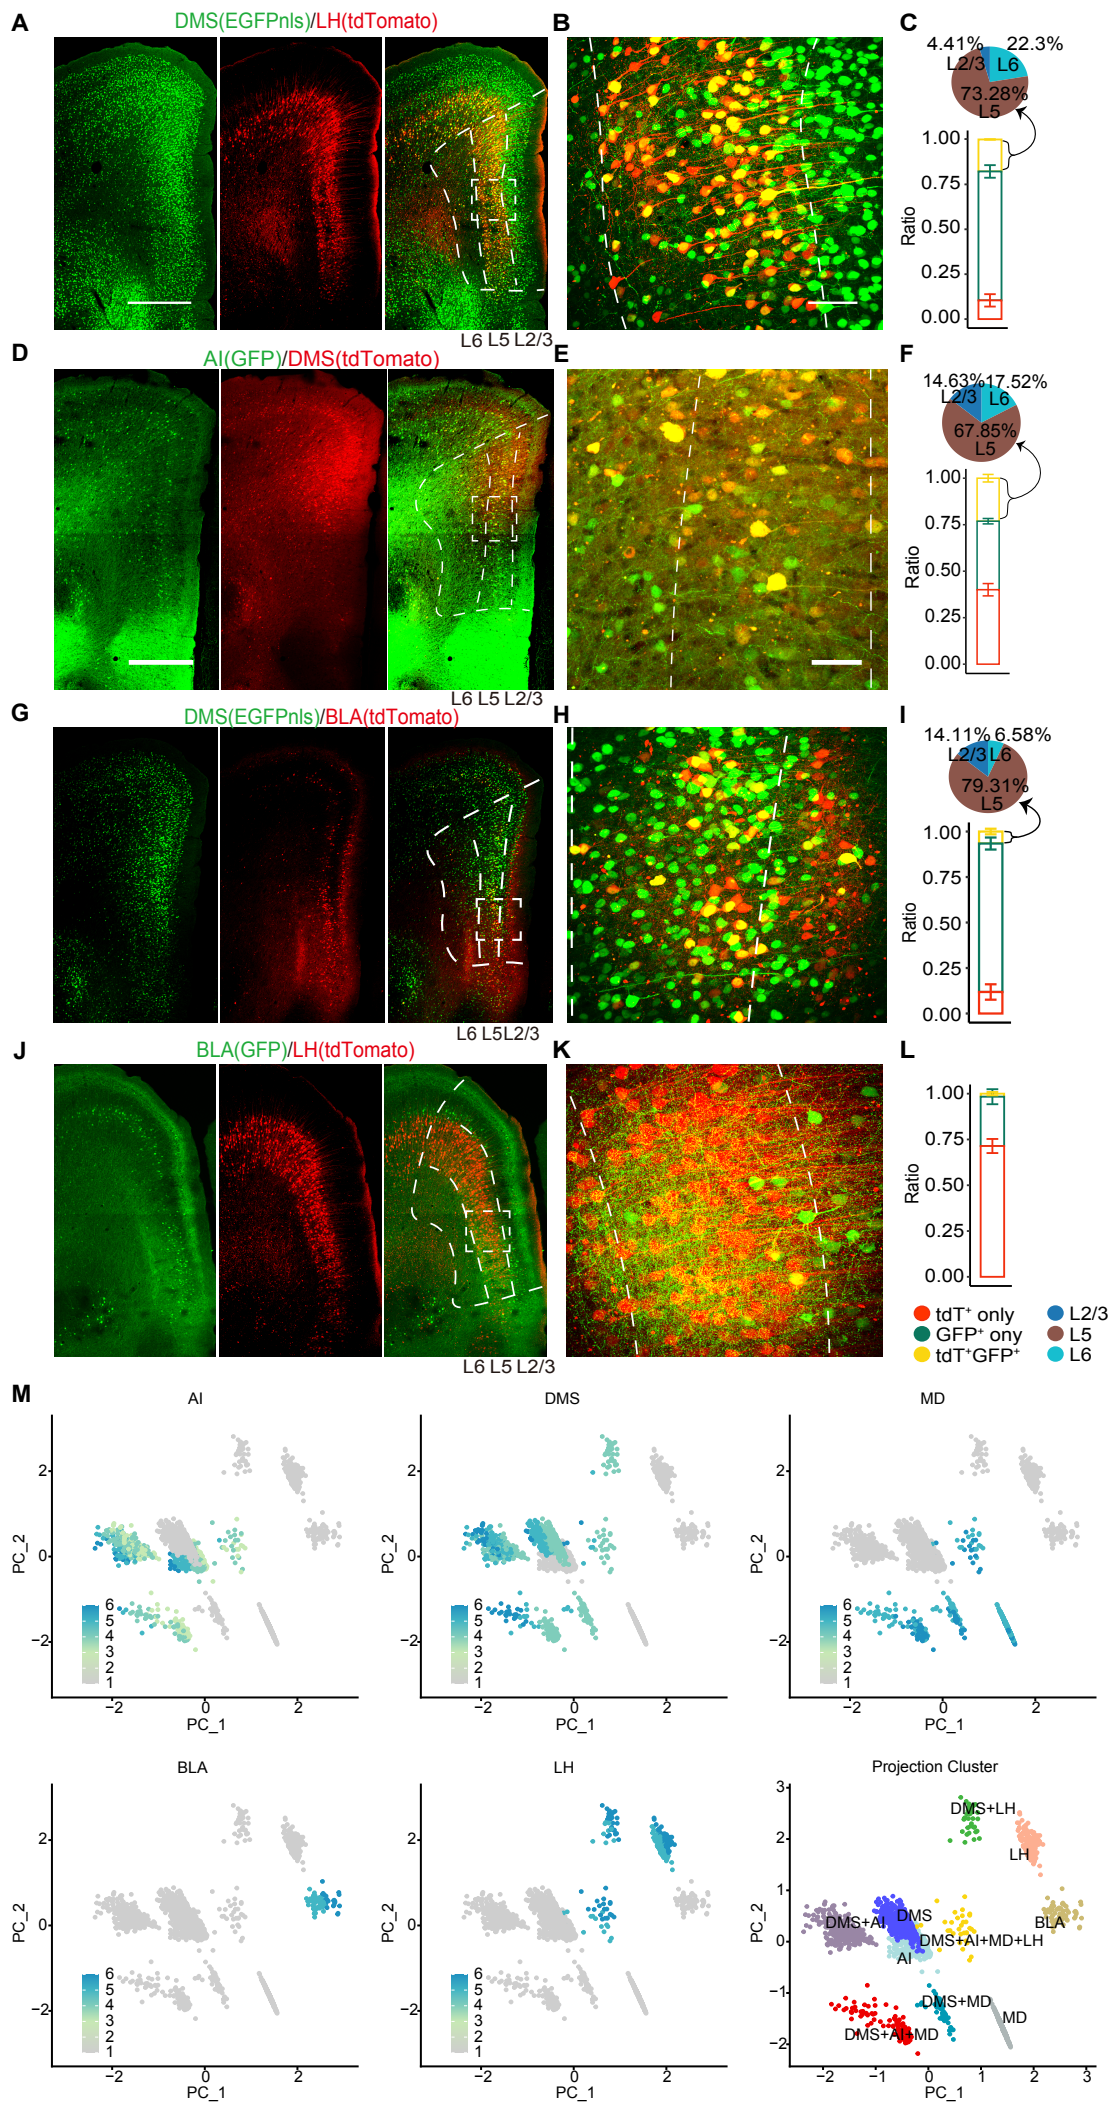

Supplement: supp [file elife-85419-supp-v1.zip]

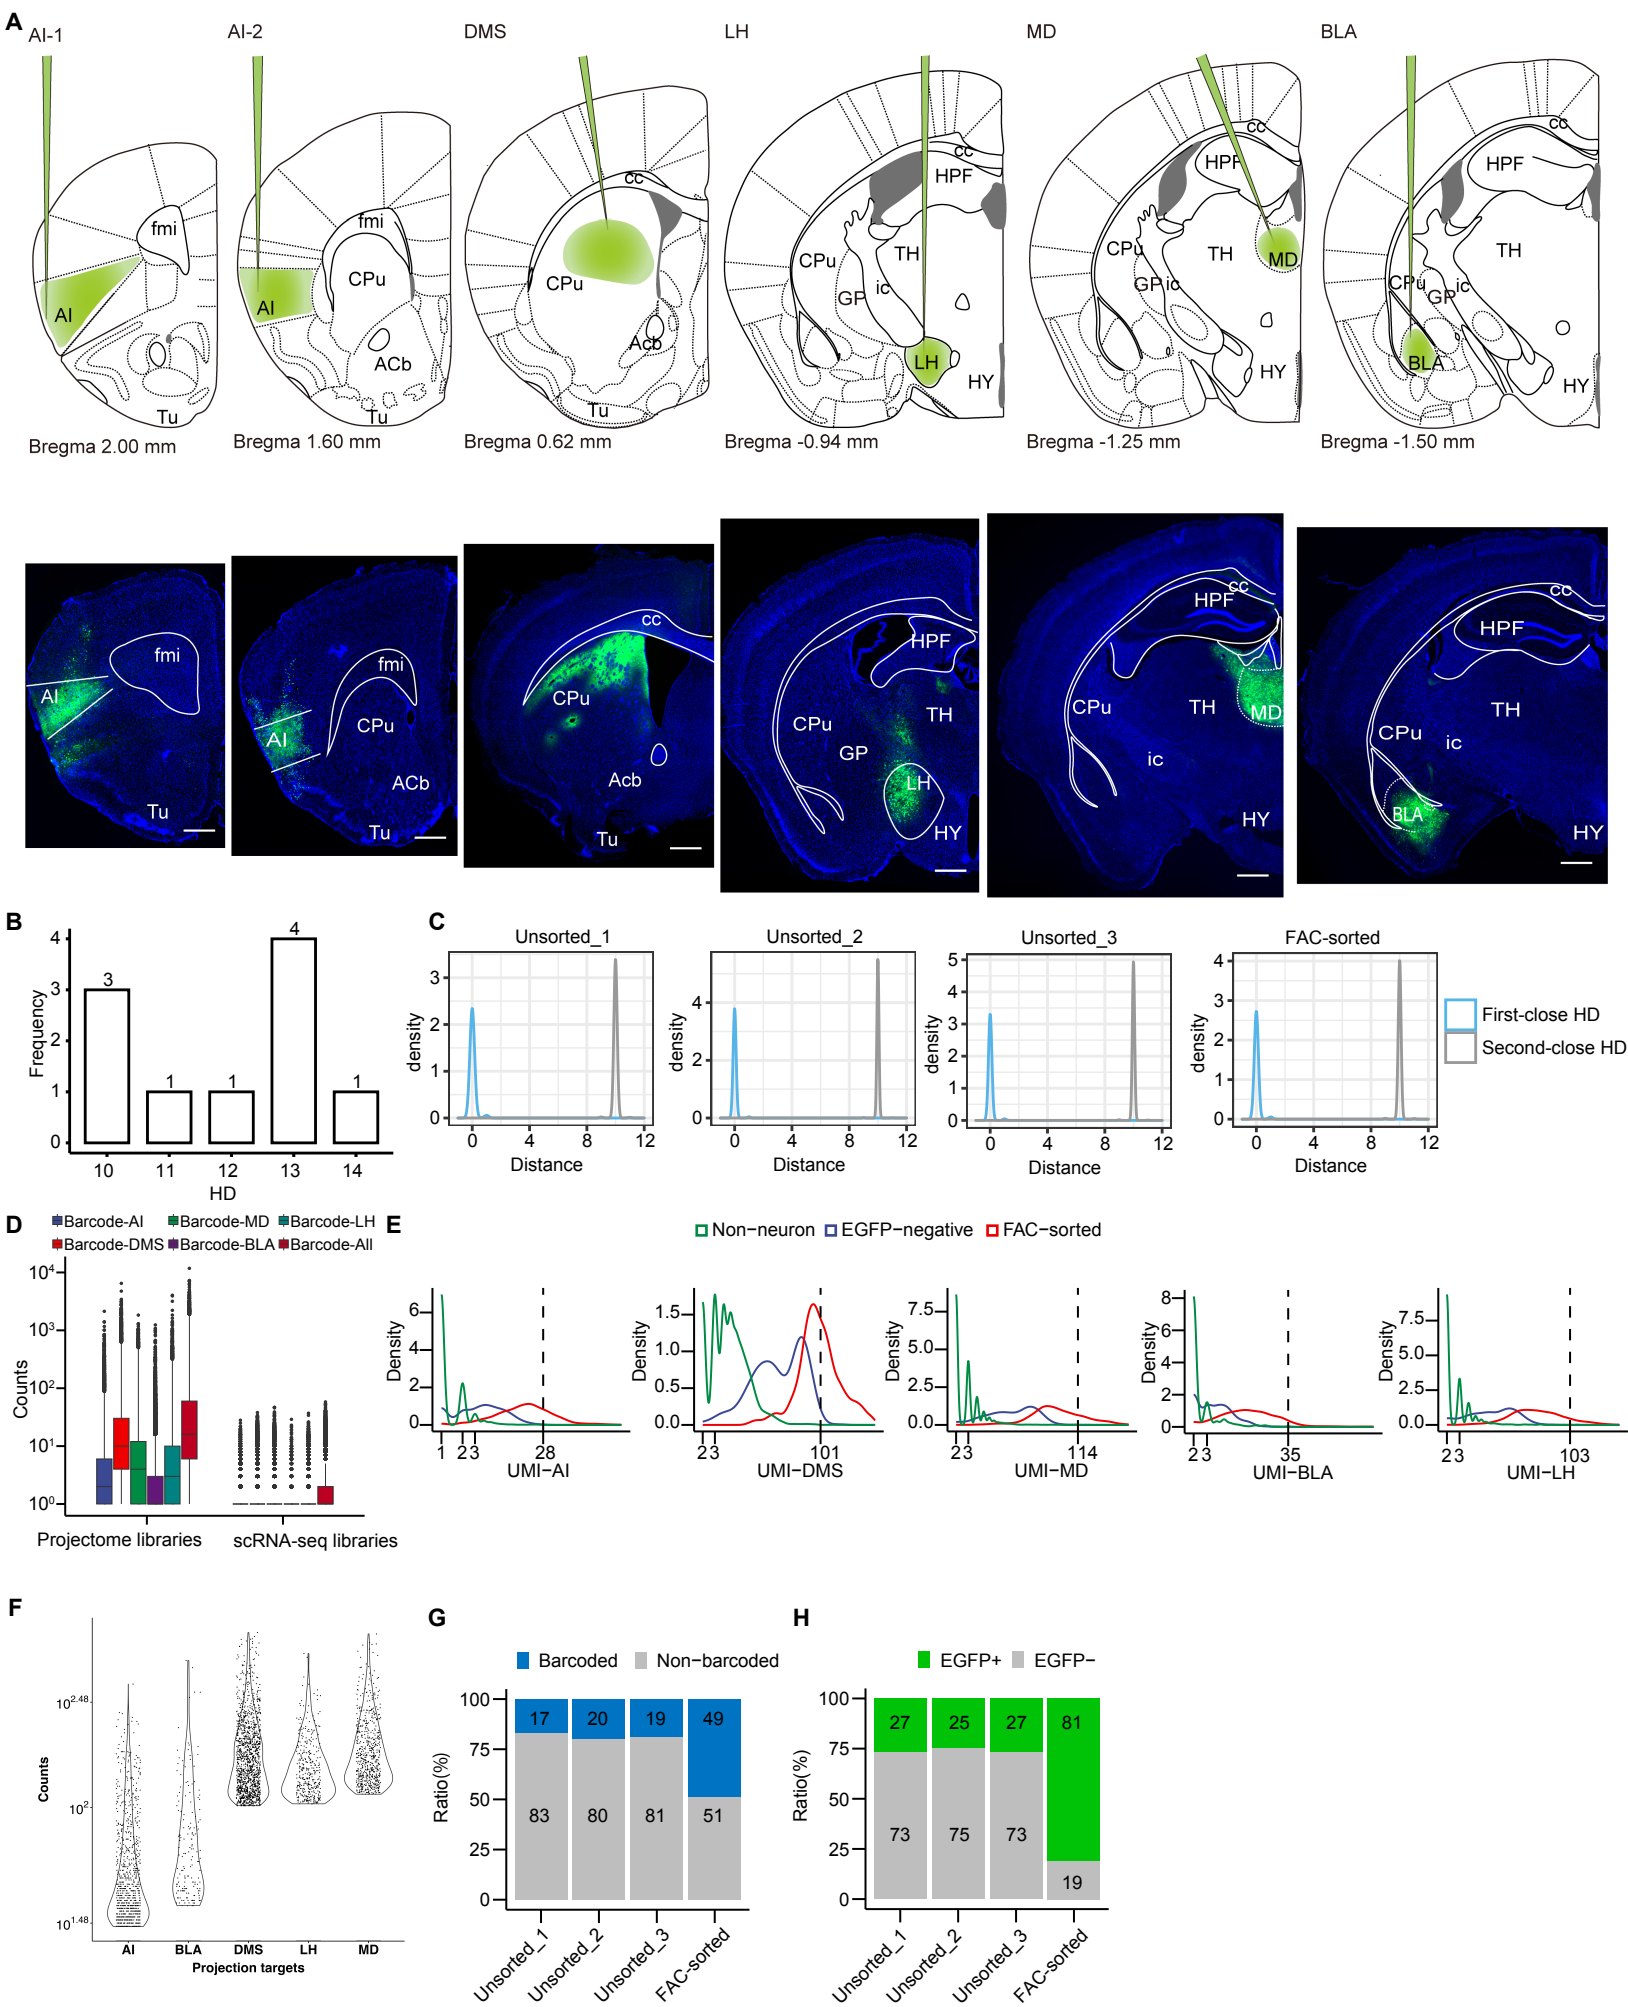

Supplement: supp [file elife-85419-supp-v1.zip]
